# Supplementary material for: Long-range memory patterns in variations of environmental radon in soil
Source: Royal Society of Chemistry journal article supplement (doi:10.1039/c3ay26486f), 2013-01-01
Supplement: c3ay26486f_2.pdf [file c3ay26486f_2.pdf]

## Appendix 2

### 2.1 Symbolic dynamics and analysis blocks

Complex nonlinear dynamical systems can be modelled and studied in the context of coarse-graining, *i.e.*, they can be viewed as information capacitors containing discrete series of symbolic messages.<sup>1–5</sup> Coarse-graining can be outlined through symbolisation, a process which allows partitioning of the full continuous phase space into finite number of cells.<sup>1</sup> In this manner, symbolisation provides a rigorous way of studying actual complex dynamics under finite precision. This operational procedure is often referred as symbolic dynamics.<sup>1,4–7</sup> One of the merits of symbolic dynamics is that it provides a strong link between dynamical systems and information theory.<sup>1,4,5,8</sup> According to symbolic dynamics, time-series are re-organised into new symbolic sequences, in which every symbol stands for a partition of the initial time-series. Every different symbol is represented by an alphabet letter and the whole procedure is called lettering.<sup>1–3,6,7,9</sup> The new sub-sequences of symbols are called words.<sup>2,3,7</sup> Reading of symbolic sub-sequences can be derived through the processes of lumping or gliding.<sup>2,3,7</sup> Lumping is the interpretation of symbolic words through independent sequential discrete portions of certain number of words, called blocks, opposed to gliding, where the portions are not independent.<sup>2,3,7</sup> Note that gliding is the standard convention in literature and is often referred also under the term sliding or moving-frame.<sup>2,3,7</sup> Block time-series symbolisation prerequisites selection of  $\lambda$  different letters from an alphabet and choice of the size,  $n$ , of blocks or words, *i.e.*, the number of sequential letters that will be treated as a whole. Depending on  $\lambda$  and  $n$  the maximum number,  $N$  of different words is determined in the selected alphabet. For example in a  $\lambda = 2$  lettering, a threshold  $C$  may be considered. Each value above this threshold may be symbolised as 1 and each below, as 0.<sup>2,3,7</sup> Initial time-series, for instance, of length  $L = 20$ , may be transformed through symbolic dynamics to *e.g.* 11001010111000101010 in the  $\lambda = 2$  lettering. Through lumping, the  $\lambda = 2$ -letter symbolic time-series may be organised in sets of  $n = 2$  blocks as (11|00|10|10|11|10| 00|10|10|10|), in which each block is one of the  $N = 2^2 = 4$  different words in this lettering, *i.e.*, (00, 01, 10, 11). The same symbolic sequence through gliding-sliding will be treated as (11|10|00|01|10|01| 10|01|11|11|10|00| 00|01|11|01|11|01| 10|01|10|), *i.e.*, the sequence will be of greater length. The  $\lambda = 2$  letter sequence may be also organised in blocks of  $n = 3$  letters with maximum of  $N = N_{3,2} = n^\lambda = 3^2 = 9$  different words, *i.e.*, (000, 001, 010, 100, 110, 011, 010, 001, 111). Other sequences of words may be generated as well. In general,<sup>1–3,6,7,9</sup> through symbolic dynamics a  $L$ -length time-series is transformed to a symbolic time-series sequence,  $[A_1, A_2, \dots, A_n, \dots, A_L]$ ,

composed by  $\lambda$  different letters,  $[A^1, A^2, \dots, A^\lambda]$ , from a  $\lambda$ -length alphabet. Symbolic time-series sequences are re-organised in  $n$ -sized words-blocks composed by letters of the alphabet  $[A^1, A^2, \dots, A^\lambda]$ . In linguistics the word size is unconfined and, hence, linguistic words contain some or, potentially, all letters. On the other hand, in symbolic dynamics, the words are of fixed lengths  $n$ ,  $n \geq \lambda$  and are chosen from  $N_{max} = N_{n,\lambda} = n^\lambda$  different fixed-sized words in the  $[A^1, A^2, \dots, A^\lambda]$  alphabet. In this manner, the symbolic time-series are re-organised as  $\dots \underbrace{A_1 \dots A_n}_{B_1} \underbrace{A_{n+1} \dots A_{2n}}_{B_2} \dots \underbrace{A_{in+1} \dots A_{(i+1)n}}_{B_{i+1}} \dots$  blocks,

where  $i$  is the consecutive number of the block, *i.e.*,  $i = 1 \dots$  Total number of blocks. In lumping the  $n$  words-blocks are sequentially independent, on the contrary to the dependent sequential blocks in the gliding-sliding process. The total number of blocks of the symbolic time-series is greater for gliding-sliding and hence more computation is needed. The probability of occurrence of a block,  $[A_1, A_2, \dots, A_n]$ , of size  $n$  is calculated by

$$p^{(n)}(A_1, A_2, \dots, A_n) = \frac{\text{Number of occurrences of block } [A_1, A_2, \dots, A_n]}{\text{Total number of blocks}} \quad (2.1)$$

### 2.2 Block entropy analysis

In the framework of complex signal analysis, specific entropy methodologies based on symbolic dynamics have been developed in the previous decade.<sup>5,10–13</sup> All these methodologies are referred as block entropies. Most common techniques rely on the extension of Shannon entropy<sup>14</sup>

$$H_S = - \sum p_i \ln p_i \quad (2.2)$$

where  $p_i$  is the number of possible microscopic configurations. Note that equation (2.2) represents the classical Boltzman's entropy for the Gibbs canonical ensemble (B-Gentropy).<sup>9</sup> Combining equations (2.1) and (2.2), the Shannon block entropy,  $H(n)$  of  $n$ -sized blocks is derived by (2.3):

$$H(n) = - \sum_{(A_1, A_2, \dots, A_n)} p^{(n)}(A_1, A_2, \dots, A_n) \ln p^{(n)}(A_1, A_2, \dots, A_n) \quad (2.3)$$

Equation (2.3) calculates the entropy due to all possible words. It is a measure of uncertainty or disorder, *i.e.*, it measures organisation deficiency of a complex system. It also gives the average amount of information necessary to predict a sub-sequence of words or blocks of length  $n$

From equation (2.3), the Shannon block entropy per letter may be derived by:

$$h^{(n)} = \frac{H(n)}{n} = \frac{- \sum_{(A_1, A_2, \dots, A_n)} p^{(n)}(A_1, A_2, \dots, A_n) \ln p^{(n)}(A_1, A_2, \dots, A_n)}{n} \quad (2.4)$$

This entropy may be interpreted as the average uncertainty of a block of size  $n$  per letter.<sup>6</sup>

From the Shannon block entropy the conditional entropy may be derived by equation (2.5):

$$h_{(n)} = H(n+1) - H(n) \quad (2.5)$$

The conditional entropy  $h_{(n)}$  measures the uncertainty of predicting a state one step into the future, provided a history of the preceding  $n$  states.<sup>6</sup>

For physical phenomena with long-range interactions or long-range memory effects, an important property observed is the violation of Boltzmann-Gibbs (B-G) statistics.<sup>15</sup> A generalised expression of the B-G statistics has been proposed based on multifractal concepts by Tsallis<sup>16,17</sup>

$$S_q = \frac{1}{q-1} \left( 1 - \sum_{i=1}^W p_i^q \right) \quad (2.6)$$

where  $p_i$  denotes, in these references, the probabilities of a sequence and  $W$  their total number.  $q$  is a real number which is the measure of non-extensivity of the system.<sup>16,17</sup> Using  $p_i^{(q-1)} = e^{(q-1)\ln(p_i)} \sim 1 + (q-1)\ln(p_i)$  in the limit  $q \rightarrow 1$  the B-G entropy is derived.<sup>6,9</sup> The generalization of B-G expression, suggests the non-extensive statistical mechanics. The entropic index  $q$  characterises the degree of nonadditivity in the following pseudo-additivity rule<sup>2,3,6,9,16</sup>

$$S_q(A, B) = S_q(A) + S_q(B) + (1-q)S_q(A)S_q(B) \quad (2.7)$$

with  $q > 1$  referring to sub-additivity and  $q < 1$  to super-additivity. Systems that called non-extensive, have special probability correlations and extensivity may occur for  $S_q$  for specific value of index  $q$ .<sup>18</sup> Tsallis entropy has been used in terms of symbolic dynamics for electromagnetic time series prior to earthquakes.<sup>2,3,6,9,16,19</sup> By properly adjusting symbolisation in accordance to (2.3) and (2.4), the Tsallis entropy of a block  $[A_1, A_2 \dots A_n]$  of length  $n$  in a  $\lambda$ -letter alphabet can be calculated by<sup>2,3,6,9,19</sup>

$$S_q(n) = \frac{1}{q-1} \left( 1 - \sum_{(A_1, A_2, \dots, A_n)} [p^{(n)}(A_1, A_2 \dots A_n)]^q \right) \quad (2.8)$$

where  $p^{(n)}(A_1, A_2 \dots A_n)$  is the probability of occurrence of block  $[A_1, A_2 \dots A_n]$ . As already mentioned, high level of organisation is indicated when low values of Tsallis entropy are produced. Tsallis entropy has been explored in the field of earthquake time series analysis.<sup>6,9,15,20-22</sup> Recent work has also been published in biomedical imaging, with suggestions in replacing Shannon's theorem<sup>23</sup> and bioinformatics.<sup>23</sup> An interconnection between fractals and Tsallis entropy that has been introduced in previous decade could provide natural frame for studying fractally structured systems.<sup>24</sup> Moreover, a possible

interconnection could exist between generalized Tsallis statistics and quantum groups.<sup>17</sup>

From (2.8) the normalised Tsallis entropy may be derived. The formula for the computation is<sup>16</sup>

$$\hat{S}_q(n) = \frac{\frac{1}{q-1} \left( 1 - \sum_{(A_1, A_2, \dots, A_n)} [p^{(n)}(A_1, A_2 \dots A_n)]^q \right)}{\sum_{(A_1, A_2, \dots, A_n)} [p^{(n)}(A_1, A_2 \dots A_n)]^q} \quad (2.9)$$

where the symbolisation was adjusted in accordance to equations (2.3) and (2.4) following the approach proposed by other investigators.<sup>6,9,19,20</sup> In equation (2.9),  $p^{(n)}(A_1, A_2 \dots A_n)$  is the probability of occurrence of the block  $[A_1, A_2 \dots A_n]$  and  $q$  is the corresponding real number of equations (2.6), (2.8) and (2.9).

The appropriate choice of the entropic index  $q$  has crucial meaning for the Tsallis and the normalised Tsallis entropy computation and requires further exploration for its proper use.<sup>9</sup> For every specific use of Tsallis entropy the ranges of the  $q$  values will result in significant discrimination.<sup>17</sup> Non-additive Tsallis entropy combined with Gutenberg-Richter law provided excellent fit to seismicities with  $q$ -values range from 1.4 to 1.85. The  $q$ -values are rooted in a rather solid physical background and describe the non-additivity of a seismic emission in a correct manner.<sup>9</sup> Moreover, index  $q$  can be considered as bias parameter with  $q < 1$  refer to rare events and  $q > 1$  refer to prominent events.<sup>22</sup> For pre-earthquake electromagnetic disturbances, the  $q$ -values are restricted in the region  $1 < q < 2$ , and are consistent with several studies that suggest the upper limit to be equal to 2.<sup>9</sup> It is noteworthy that entropic index  $q$  is not a measure of complexity but measures the non-extensivity of the system.<sup>6</sup>

## References

- 1 K. Karamanos and G. Nicolis, *Chaos Soliton. Frac.*, 1999, **10**, 1135–1150.
- 2 K. Karamanos, D. Dakopoulos, K. Aloupis, A. Peratzakis, L. Athanasopoulou, S. Nikolopoulos, P. K. P and K. Eftaxias, *Phys. Rev. E.*, 2006, **74**, 21–36.
- 3 K. Karamanos, *J Phys. A Math. Gen.*, 2001, **34**, 9231–9241.
- 4 J. Nicolis, *Chaos and Information Processing*, World Scientific, Singapore, 1991.
- 5 G. Nicolis and P. Gaspard, *Chaos Soliton. Fract.*, 1994, **4**, 41–57.
- 6 K. Eftaxias, G. Balasis, Y. Contoyiannis, C. Papadimitriou, M. Kalimeri, L. Athanasopoulou, S. Nikolopoulos, J. Kopanas, G. Antonopoulos and C. Nomicos, *Nat. Hazard Earth Sys.*, 2009, **9**, 1953–1971.

- 7 K. Karamanos, D. Dakopoulos, K. Aloupis, A. Peratzakis, L. Athanasopoulou, S. Nikolopoulos, P. K. P and K. Eftaxias, *Phys. Rev. E.*, 2006, **74**, 21–36.
- 8 A. Voss, J. Kurths, H. Kleiner, A. Witt, N. Wessel, N. S. ad K. Osterziel, R. Schurath and R. Dietz, *Cardiovasc. Res.*, 1996, **31**, 419–433.
- 9 M. Kalimeri, C. Papadimitriou, G. Balasis and K. Eftaxias, *Physica A*, 2008, **387**, 1161–1172.
- 10 W. Ebeling, *Physica D*, 1997, **109**, 42–52.
- 11 W. Ebeling and G. Nicolis, *Chaos Soliton Fract.*, 1992, **2**, 635–650.
- 12 W. Ebeling and G. Nicolis, *Europhys Lett.*, 1991, **14**, 191–196.
- 13 K. Karamanos, *Lect. Notes Phys.*, 2000, **550**, 357–371.
- 14 C. Shannon, *Tech. J.*, 1948, **27**, 379–423.
- 15 Y. Contoyiannis and K. Eftaxias, *Nonlin. Processes Geophys.*, 2008, **15**, 379–388.
- 16 H. Suyari, 2002.
- 17 C. Tsallis, *J. Stat. Phys.*, 1988, **52**, 479–487.
- 18 J. Boon and K. Tsallis, *Europhys. News*, 2005, **36**, 185–186.
- 19 K. Eftaxias, G. Balasis, Y. Contoyiannis, C. Papadimitriou, M. Kalimeri, L. Athanasopoulou, S. Nikolopoulos, J. Kopanas, G. Antonopoulos and C. Nomicos, *Nat. Hazard Earth Sys.*, 2010, **10**, 275–294.
- 20 K. Eftaxias, *Physica A*, 2010, **389**, 133–140.
- 21 V. Surkov, S. Uyeda, H. Tanaka and M. Hayakawa, *J. Geodyn.*, 2002, **33**, 477–487.
- 22 L. Zunino, D. Perez, A. Kowalski, M. Martin, M. Garavaglia, A. Plastino and O. Rosso, *Physica A*, 2008, **387**, 60057–6068.
- 23 J. Mohanalin, S. Beenamol, P. Kalra and N. Kumar, *Comput. Math. Appl.*, 2010, **60**, 2426–2432.
- 24 F. Lopes, E. de Oliveira and R. Cesar, *BMC Syst. Biol.*, 2011, **5**, 61–69.
